# Supplementary material
Source: Springer Nature journal article supplement (https://www.springermedizin.de/resource/supplementary/12969_2008_362_MOESM4_ESM.pdf/9592914)

**A**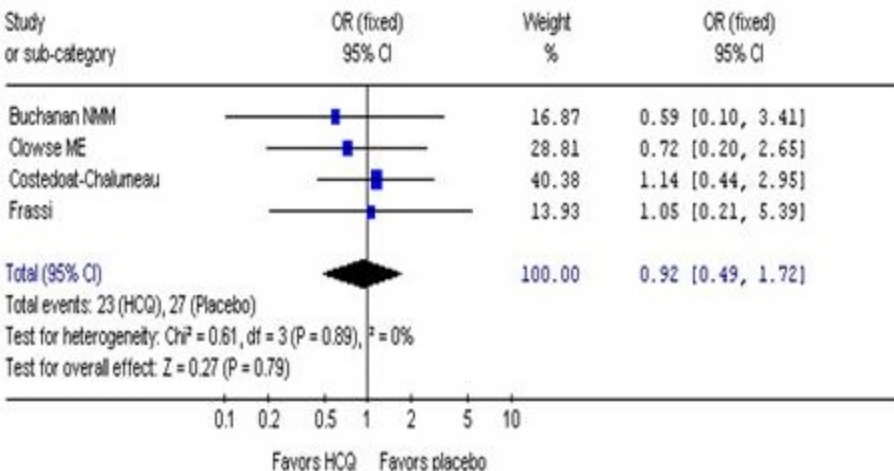**B**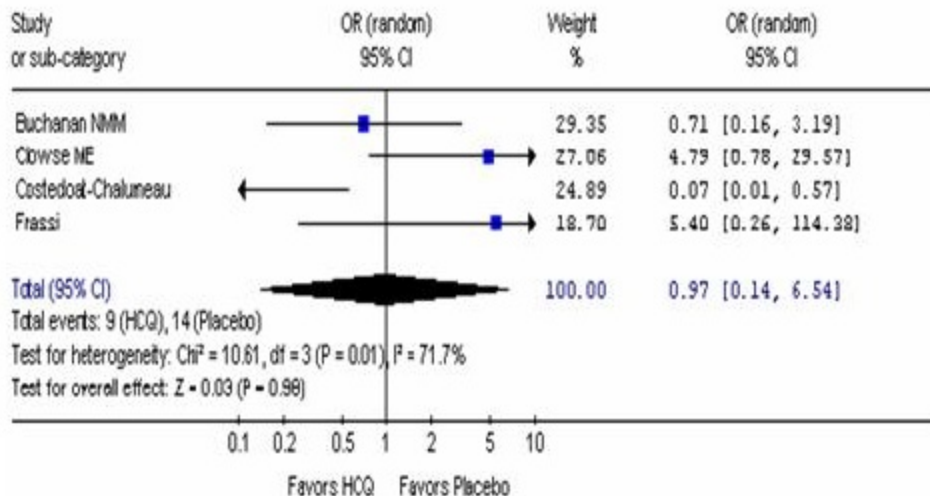

Supplement: MOESM4 [file 9592914]
